# Supplementary material for: ABO and Rhesus Blood Groups in Acute Puumala Hantavirus Infection
Source: MDPI journal article supplement (doi:10.3390/v13112271), 2021-11-13
Supplement: s1 [file s1]

[illegible]

|       |   |    |     |    |      |       |   |   |     |     |     |    |
|-------|---|----|-----|----|------|-------|---|---|-----|-----|-----|----|
| 43,51 | 0 | 5  | 160 | 90 | 2,4  | 27,44 | 0 | 0 | 171 | 155 | 102 | 85 |
| 40,82 | 0 | 9  | 140 | 75 | 8    | 24,65 | 1 | 0 | 150 | 135 | 79  | 72 |
| 50,81 | 0 | 5  | 145 | 95 | 0    | 25,16 | 0 | 0 | 142 | 131 | 95  | 87 |
| 61,88 | 0 | 13 | 152 | 86 | 3,2  | 23,09 | 1 | 0 | 186 | 114 | 104 | 70 |
| 43,26 | 0 | 2  |     |    | 0,3  |       |   |   | 138 | 129 | 70  | 67 |
| 59,2  | 1 | 5  |     |    |      |       |   |   |     |     |     |    |
| 55,51 | 0 | 7  |     |    | 18,5 |       |   |   | 160 | 109 | 84  | 65 |
| 29,68 | 1 | 10 |     |    | 8,4  |       |   |   | 165 | 120 | 90  | 70 |
| 27    | 0 | 9  |     |    | 5,7  |       |   |   | 152 | 120 | 95  | 80 |
| 57,94 | 1 | 19 |     |    | 5,2  |       |   |   | 150 | 140 | 90  | 70 |
| 31,65 | 0 | 4  |     |    | 0    |       |   |   | 105 | 105 | 60  | 60 |
| 56,18 | 1 | 6  |     |    | 0,6  |       |   |   | 140 | 118 | 78  | 70 |
| 21,74 | 0 | 5  |     |    | 0    |       |   |   | 130 | 124 | 84  | 80 |
| 43,69 | 0 | 8  |     |    | 3,4  |       |   |   | 130 | 130 | 80  | 50 |
| 25,7  | 0 | 4  |     |    | 1,7  |       |   |   | 142 | 142 | 80  | 80 |
| 39,03 | 0 | 9  |     |    | 2,6  |       |   |   | 116 | 100 | 80  | 64 |
| 36,61 | 0 | 7  |     |    |      |       |   |   |     |     |     |    |
| 56,06 | 0 | 9  |     |    | 4,2  |       |   |   | 125 | 95  | 75  | 50 |
| 40,07 | 1 | 8  |     |    | 0,7  |       |   |   | 125 | 125 | 70  | 70 |
| 27,76 | 0 | 6  |     |    | 0,7  |       |   |   | 120 | 110 | 75  | 55 |
| 61,4  | 1 | 16 |     |    | 0    |       |   |   | 130 | 130 | 70  | 70 |
| 51,64 | 0 | 11 |     |    | 2    |       |   |   | 120 | 100 | 75  | 60 |
| 23,62 | 1 | 5  | 130 | 80 | 1    | 22,31 |   |   | 130 | 130 | 80  | 80 |
| 36,4  | 0 | 11 |     |    | 7,2  |       |   |   | 120 | 110 | 80  | 80 |
| 38,29 | 0 | 11 |     |    | 5,3  |       |   |   | 120 | 115 | 100 | 80 |
| 32,52 | 0 | 7  |     |    | 3,5  |       |   |   | 140 | 138 | 85  | 78 |
| 39,42 | 0 | 8  |     |    | 0,9  |       |   |   | 145 | 134 | 90  | 80 |
| 33,43 | 0 | 10 |     |    | 2,1  |       |   |   | 154 | 130 | 100 | 85 |
| 44,68 | 0 | 13 |     |    | 4,9  |       |   |   | 175 | 130 | 118 | 90 |
| 47,18 | 0 | 5  | 140 | 95 | 1    | 25,47 | 0 | 0 | 140 | 120 | 95  | 80 |
| 41,09 | 0 | 14 | 150 | 80 | 8,7  |       | 0 | 0 | 160 | 134 | 85  | 60 |
| 49,66 | 1 | 10 | 150 | 95 | 4,6  |       | 0 | 0 | 150 | 120 | 95  | 70 |
| 36,88 | 0 | 9  |     |    | 10,2 |       | 0 | 0 | 160 | 128 | 100 | 70 |

|       |   |    |     |     |            |   |   |     |     |     |    |
|-------|---|----|-----|-----|------------|---|---|-----|-----|-----|----|
| 23,23 | 0 | 7  | 144 | 98  | 1,2        | 0 | 0 | 144 | 118 | 104 | 80 |
| 48,95 | 0 | 8  | 150 | 95  | 0,4        | 0 | 0 | 160 | 132 | 80  | 60 |
| 36,79 | 0 | 5  | 100 | 80  | 3 24,61    | 0 |   | 112 | 90  | 82  | 60 |
| 56,49 | 0 | 7  | 135 | 95  |            | 0 | 0 |     |     |     |    |
| 43,49 | 0 | 4  | 110 | 70  | 1,1 29,8   | 0 | 0 | 120 | 110 | 78  | 60 |
| 29,12 | 1 | 13 |     |     |            | 0 | 0 | 110 | 95  | 75  | 70 |
| 56,9  | 1 | 6  | 130 | 75  | 1 21,33    | 0 | 0 | 130 | 110 | 75  | 60 |
| 32,33 | 1 | 8  | 120 | 80  | 3,7 29,61  | 0 | 0 | 130 | 120 | 85  | 80 |
| 42,42 | 0 | 8  | 140 | 85  | 0,7        | 0 | 0 | 140 | 116 | 85  | 78 |
| 35,72 | 0 | 11 | 140 | 70  | 1,4        | 0 | 0 | 140 | 100 | 80  | 64 |
| 47,92 | 0 | 7  | 140 | 100 | 3 30,42    | 0 | 0 | 154 | 135 | 102 | 88 |
| 36,33 | 1 | 8  | 105 | 65  | 3,7 22,7   | 0 | 0 | 110 | 90  | 72  | 60 |
| 47,14 | 1 | 9  | 130 | 70  | 3,8 35,1   | 0 | 0 | 160 | 120 | 80  | 70 |
| 45,17 | 0 | 6  | 150 | 100 | 0,8        | 0 | 0 | 150 | 140 | 100 | 90 |
| 35,08 | 0 | 5  | 135 | 80  | 0,4 22,67  | 0 | 0 | 135 | 130 | 80  | 75 |
| 46,15 | 1 | 8  | 110 | 80  | 2,9 26,32  | 0 | 0 | 140 | 110 | 90  | 80 |
| 33,4  | 0 | 11 | 130 | 60  | 3,2 24,91  | 0 | 0 | 130 | 110 | 80  | 60 |
| 38,66 | 0 | 7  | 140 | 85  | 0,7 24,76  | 0 | 0 | 180 | 135 | 85  | 60 |
| 31,79 | 0 | 9  | 150 | 70  | 0,4 28,38  | 0 | 0 | 155 | 150 | 80  | 70 |
| 30,48 | 0 | 11 | 160 | 100 | 2,9 24,27  | 0 | 0 | 160 | 135 | 100 | 75 |
| 44,01 | 0 | 7  | 150 | 90  | 3,1 20,63  | 0 | 0 | 150 | 150 | 90  | 70 |
| 36,24 | 0 | 7  | 100 | 60  | 1,1 22,92  | 0 | 0 | 106 | 100 | 75  | 68 |
| 43,42 | 0 | 12 |     |     | 5,5        | 0 | 0 | 125 | 115 | 80  | 70 |
| 43,42 | 0 | 12 |     |     | 4,5 20,95  | 0 | 0 | 132 | 130 | 90  | 80 |
| 25,36 | 0 | 6  |     |     | 1,3        | 0 | 0 | 120 | 120 | 80  | 80 |
| 55,18 | 1 | 12 |     |     | 2,4        | 0 | 0 | 155 | 74  | 85  | 65 |
| 33,67 | 0 | 8  | 130 | 80  | 0,9        | 0 | 0 | 130 | 114 | 80  | 65 |
| 42,77 | 1 | 7  | 174 | 112 | 3,7 22,72  | 0 | 0 | 174 | 130 | 112 | 70 |
| 53,07 | 1 | 8  | 100 | 60  | 2,8 23,31  | 0 | 0 | 132 | 100 | 94  | 60 |
| 50,4  | 1 | 27 | 100 | 60  | 16,1 44,24 | 1 | 0 | 210 | 100 | 110 | 70 |
| 47,19 | 0 | 14 | 100 | 70  | 4,7 22,04  | 1 | 0 | 120 | 100 | 80  | 60 |
| 40,19 | 0 | 8  | 120 | 78  | 6,4        | 1 | 0 | 162 | 120 | 98  | 78 |
| 63,69 | 0 | 7  | 130 | 74  | 5,7 23,62  | 0 | 0 | 161 | 130 | 93  | 74 |

|       |   |    |     |     |      |       |   |   |     |     |     |    |
|-------|---|----|-----|-----|------|-------|---|---|-----|-----|-----|----|
| 39,6  | 0 | 10 |     |     | 2,1  |       |   |   | 145 | 110 | 90  | 64 |
| 52,39 | 0 | 7  |     |     | 3,3  |       |   |   | 146 | 126 | 92  | 77 |
| 26,69 | 1 | 9  |     |     |      |       |   |   |     |     |     |    |
| 33,43 | 1 | 4  | 114 | 80  | 1,3  | 22,21 | 0 | 0 | 114 | 100 | 80  | 64 |
| 44,05 | 1 | 10 | 120 | 80  | 6,4  | 30,3  | 0 | 0 | 140 | 116 | 90  | 80 |
| 44,58 | 1 | 5  | 140 | 92  | 0,8  | 26,37 | 0 | 0 | 140 | 125 | 92  | 70 |
| 64,14 | 1 | 5  | 160 | 95  | 0,5  |       | 0 | 0 | 160 | 120 | 95  | 70 |
| 36,8  | 0 | 9  | 110 | 75  | 1,5  | 23,47 | 0 | 0 | 110 | 110 | 75  | 75 |
| 46,01 | 0 | 7  | 115 | 78  | 3,8  | 28,87 | 0 | 0 | 144 | 115 | 99  | 78 |
| 29,4  | 0 | 8  | 134 | 80  | 2,1  | 21,11 | 0 | 0 | 134 | 126 | 80  | 66 |
| 24,11 | 0 | 5  | 155 | 75  | 2,1  | 26,07 | 0 | 0 | 165 | 155 | 104 | 75 |
| 42,4  | 1 | 6  | 130 | 90  | 1,8  | 31,72 | 0 | 0 | 160 | 115 | 86  | 77 |
| 60,36 | 1 | 7  |     |     | 0,7  |       |   |   | 150 | 132 | 80  | 70 |
| 33,51 | 0 | 6  |     |     | 3,1  |       |   |   | 148 | 128 | 90  | 76 |
| 47,47 | 0 | 17 | 135 | 90  | 8,7  | 25,12 | 0 | 0 | 180 | 126 | 120 | 80 |
| 56,85 | 0 | 10 | 145 | 60  | 7,3  | 21,87 | 0 | 0 | 150 | 116 | 109 | 60 |
| 37,68 | 0 | 6  | 145 | 110 | 6,2  | 22,45 | 1 | 0 | 145 | 140 | 110 | 80 |
| 44,03 | 0 | 7  |     |     | 0,5  |       |   |   | 140 | 110 | 85  | 60 |
| 28,58 | 0 | 11 |     |     | 5,3  |       |   |   | 120 | 110 | 70  | 50 |
| 29,34 | 0 | 18 | 110 | 65  | 2,1  |       | 0 | 0 | 112 | 100 | 78  | 60 |
| 24,87 | 0 | 15 | 100 | 60  | 10,2 | 24,1  | 0 | 0 | 150 | 100 | 95  | 60 |
| 54,67 | 1 | 12 | 138 | 70  | 1,6  |       | 0 | 0 | 138 | 114 | 74  | 70 |
| 33,61 | 1 | 12 | 110 | 60  | 2,8  | 19,96 | 1 | 0 | 147 | 106 | 97  | 72 |
| 51,12 | 0 | 6  | 125 | 84  | 4,1  | 29,53 | 0 | 0 | 125 | 120 | 100 | 80 |
| 56,94 | 0 | 5  | 120 | 84  | 1,5  | 35,75 | 0 | 0 | 136 | 120 | 92  | 84 |
| 47,55 | 1 | 8  | 90  |     | 3,3  | 31,44 | 0 | 1 | 166 | 90  | 105 | 87 |
| 27,81 | 1 | 10 |     |     | 4,7  |       |   |   | 162 | 100 | 65  | 58 |
| 44,79 | 1 | 5  |     |     | 1,2  |       |   |   | 120 | 120 | 74  | 74 |
| 52,61 | 0 | 9  |     |     | 2,8  |       |   |   | 170 | 144 | 100 | 80 |
| 46,55 | 1 | 18 |     |     | 12,9 |       |   |   | 180 | 120 | 100 | 80 |
| 58,95 | 0 | 8  |     |     | 1,4  |       |   |   | 160 | 145 | 100 | 85 |
| 33,57 | 0 | 9  | 145 | 95  | 6,2  |       |   |   |     |     | 95  |    |
| 19,72 | 0 | 12 |     |     | 5,9  |       |   |   | 180 | 180 | 80  | 80 |

|       |   |    |     |    |            |   |   |  |     |     |     |     |
|-------|---|----|-----|----|------------|---|---|--|-----|-----|-----|-----|
| 25,7  | 0 | 11 |     |    | 5,1        |   |   |  | 160 | 138 | 96  | 82  |
| 21,62 | 1 | 6  | 130 | 60 | 0,4 20,23  | 0 | 0 |  | 130 | 130 | 60  | 60  |
| 60,06 | 0 | 10 | 104 | 68 | 4,7 26,46  | 0 | 0 |  | 156 | 104 | 92  | 67  |
| 49,29 | 0 | 4  | 130 | 85 | 3 29,94    | 0 | 0 |  | 130 | 130 | 85  | 85  |
| 29,45 | 1 | 3  | 120 | 85 | 0,4        | 0 | 0 |  | 122 | 110 | 85  | 68  |
| 46,84 | 0 | 18 | 150 | 85 | 11,8 24,98 | 0 | 0 |  | 180 | 115 | 102 | 64  |
| 29,99 | 0 | 6  |     |    | 1,4        | 0 | 0 |  | 136 | 110 | 90  | 80  |
| 21,89 | 0 | 6  | 118 | 88 | 6,3 25,7   | 0 | 0 |  | 140 | 90  | 82  | 50  |
| 32,87 | 0 | 8  | 120 | 70 | 1,3 22,68  | 0 | 0 |  | 120 | 104 | 75  | 70  |
| 40,43 | 0 | 9  |     |    | 0,4 20,77  | 0 | 0 |  | 124 | 124 | 84  | 84  |
| 39,6  | 0 | 10 |     |    | 2,7 21,85  | 0 | 0 |  | 134 | 110 | 85  | 58  |
| 29,53 | 1 | 8  | 125 | 90 | 0,4 19,48  | 0 | 0 |  | 125 | 125 | 90  | 90  |
| 31,55 | 0 | 7  |     |    | 2 30,93    | 0 | 0 |  | 130 | 120 | 90  | 70  |
| 25,42 | 0 | 9  | 145 | 85 | 1,4 21,05  | 0 | 0 |  | 145 | 140 | 85  | 80  |
| 51,79 | 0 | 10 | 125 | 85 | 4,8        | 0 | 0 |  | 160 | 120 | 85  | 70  |
| 40,25 | 0 | 7  |     |    | 2,9        | 0 | 0 |  | 130 | 120 | 90  | 70  |
| 23,16 | 1 | 7  | 135 | 85 | 2,2 18,93  | 0 | 0 |  | 135 | 110 | 85  | 65  |
| 29,59 | 0 | 6  | 158 | 78 | 0 20,76    | 0 | 0 |  | 156 | 110 | 90  | 60  |
| 31,42 | 0 | 9  | 105 | 55 | 4,7        | 0 | 0 |  | 155 | 120 | 105 | 78  |
| 56,21 | 0 | 5  |     |    | 0,9 24,22  | 0 | 0 |  | 174 | 92  | 174 | 109 |
| 30,05 | 0 | 9  | 120 | 75 | 4,9 18,92  | 0 | 0 |  | 132 | 110 | 81  | 69  |
| 36,97 | 0 | 20 | 105 | 90 | 6,2 20,9   | 1 | 0 |  | 160 | 105 | 90  | 70  |
| 52,59 | 0 | 46 |     |    |            | 1 | 1 |  |     |     |     |     |
| 33,63 | 0 | 2  |     |    | 0          |   |   |  | 120 | 120 | 80  | 70  |
| 51,67 | 1 | 11 | 116 | 90 | 5,8 23,15  | 0 | 0 |  | 180 | 105 | 108 | 70  |
| 25,56 | 1 | 5  | 105 | 70 | 2,5 21,09  | 0 | 0 |  | 116 | 105 | 96  | 68  |
| 32,69 | 0 | 6  | 135 | 75 | 3,7 24,39  | 0 | 0 |  | 135 | 109 | 75  | 72  |
| 28,21 | 0 | 5  | 115 | 60 | 1,4 21,68  | 0 | 0 |  | 113 | 93  | 71  | 61  |
| 57,76 | 1 | 11 | 104 | 72 | 10,1 22,04 | 1 | 0 |  | 129 | 96  | 76  | 51  |
| 39,12 | 0 | 8  | 90  | 70 | 1,7 20,38  | 1 | 1 |  | 123 | 90  | 79  | 60  |
| 61,24 | 0 | 21 |     |    | 8          |   |   |  | 180 | 90  | 80  | 60  |
| 45,7  | 0 | 15 |     |    |            |   |   |  | 145 | 80  | 95  | 40  |
| 30,35 | 0 | 8  |     |    | 3,2        |   |   |  | 170 | 134 | 85  | 75  |

|       |   |    |     |    |            |  |     |     |     |     |    |
|-------|---|----|-----|----|------------|--|-----|-----|-----|-----|----|
| 38,37 | 0 | 8  |     |    | 0          |  |     | 140 | 140 | 75  | 75 |
| 29,37 | 0 | 8  |     |    | 1,3        |  |     | 145 | 125 | 90  | 75 |
| 68,86 | 1 | 8  | 110 | 80 |            |  | 0 0 |     |     |     |    |
| 51,74 | 0 | 5  |     |    | 0,9 23,56  |  | 0 0 | 115 | 110 | 65  | 60 |
| 31,64 | 0 | 6  | 140 | 90 | 2 22,5     |  | 0 0 | 140 | 124 | 90  | 76 |
| 50,17 | 0 | 9  | 155 | 80 | 1,8 25,82  |  | 0 0 | 155 | 130 | 82  | 80 |
| 49,1  | 0 | 7  | 140 | 80 | 2,4 22,68  |  | 0 0 | 140 | 140 | 80  | 80 |
| 45,12 | 0 | 10 | 126 | 84 | 4          |  | 0 0 | 140 | 120 | 95  | 70 |
| 27,56 | 1 | 12 |     |    | 5,7        |  | 0 0 | 115 | 100 | 80  | 55 |
| 30,74 | 0 | 5  | 125 | 70 | 6,9        |  | 0 0 | 125 | 120 | 70  | 60 |
| 33,58 | 0 | 9  | 150 | 85 | 4,3 25,92  |  | 0 0 | 150 | 150 | 85  | 85 |
| 53,59 | 0 | 6  | 130 | 75 | 0,5 26,76  |  | 0 0 | 130 | 118 | 76  | 67 |
| 54,69 | 0 | 17 |     |    | 18,5       |  | 0 1 | 150 | 70  | 80  | 40 |
| 44,48 | 1 | 10 | 124 | 88 |            |  | 0 0 | 160 | 124 | 92  | 80 |
| 46,4  | 0 | 7  | 110 | 90 | 1,4 29,98  |  | 0 0 | 140 | 100 | 100 | 70 |
| 61,73 | 0 | 14 |     |    | 3,1 26,44  |  | 0 0 | 160 | 150 | 100 | 80 |
| 41,83 | 1 | 8  | 140 | 80 | 4 27,37    |  | 0 0 | 160 | 140 | 95  | 80 |
| 56,25 | 1 | 5  | 142 | 84 | 1,6 28,8   |  | 0 0 | 142 | 114 | 84  | 75 |
| 49,74 | 0 | 19 | 108 | 70 | 11,2 28,77 |  | 1 0 | 150 | 98  | 90  | 75 |
| 29,16 | 1 | 7  | 120 | 78 | 2,2 23,04  |  | 0 0 | 184 | 116 | 86  | 74 |
| 44,24 | 0 | 7  | 125 | 75 | 1,3        |  | 0 0 | 132 | 120 | 90  | 60 |
| 38,77 | 0 | 4  |     |    | 0,9 35,43  |  |     | 140 | 105 | 82  | 50 |
| 26,43 | 0 | 5  |     |    | 1,1        |  |     | 140 | 140 | 80  | 80 |
| 31,96 | 1 | 5  |     |    |            |  |     | 105 | 105 | 80  | 80 |
| 53,81 | 0 | 7  |     |    | 2,7        |  |     | 130 | 104 | 80  | 64 |
| 33,23 | 1 | 5  |     |    | 1,4        |  |     | 112 | 95  | 68  | 60 |
| 29,18 | 0 | 3  |     |    | 0,9        |  |     | 140 | 136 | 85  | 80 |
| 41,64 | 0 | 2  | 140 | 90 |            |  |     | 140 | 140 | 90  | 90 |
| 26,46 | 1 | 12 |     |    |            |  |     |     |     |     |    |
| 44,59 | 1 | 8  |     |    | 1,8        |  |     | 120 | 85  | 80  | 40 |
| 50,56 | 0 | 8  |     |    | 2,2        |  |     | 155 | 130 | 90  | 80 |
| 28,7  | 0 | 6  |     |    | 0,9        |  |     | 110 | 110 | 70  | 70 |
| 40,09 | 0 | 10 |     |    | 5,8        |  |     | 150 | 150 | 85  | 85 |

|       |   |    |     |     |      |       |   |   |     |     |     |    |
|-------|---|----|-----|-----|------|-------|---|---|-----|-----|-----|----|
| 44,04 | 0 | 12 |     |     | 5    |       |   |   | 125 | 98  | 85  | 60 |
| 55,85 | 1 | 10 |     |     | 4    |       |   |   | 160 | 160 | 90  | 90 |
| 42,22 | 0 | 11 |     |     | 5,5  |       |   |   | 165 | 125 | 100 | 80 |
| 43,83 | 0 | 7  | 155 | 100 | 0    |       |   |   |     |     |     |    |
| 41,18 | 1 | 14 |     |     | 5,1  |       |   |   | 100 | 100 | 55  | 55 |
| 27,3  | 0 | 12 |     |     | 10,8 |       |   |   | 170 | 145 | 115 | 90 |
| 38,34 | 0 | 12 |     |     | 4,6  |       |   |   | 145 | 132 | 90  | 70 |
| 46,42 | 1 | 20 |     |     | 4,8  |       |   |   | 150 | 125 | 100 | 75 |
| 34,6  | 0 | 7  |     |     | 0,6  |       |   |   | 140 | 125 | 88  | 80 |
| 27,09 | 0 | 12 |     |     | 8,5  |       |   |   | 160 | 90  | 85  |    |
| 46,98 | 0 | 9  |     |     | 5,1  |       |   |   | 155 | 148 | 105 | 90 |
| 25,94 | 0 | 8  |     |     | 4,2  |       |   |   |     |     |     |    |
| 34,42 | 0 | 8  |     |     |      |       |   |   |     |     |     |    |
| 36,56 | 0 | 8  |     |     | 0,7  |       |   |   | 110 | 110 | 80  | 80 |
| 35,93 | 0 | 14 |     |     | 0,6  |       |   |   | 130 | 120 | 80  | 68 |
| 22,34 | 0 | 10 |     |     | 1,6  |       |   |   | 130 | 130 | 80  | 80 |
| 41,28 | 0 | 8  |     |     | 2,3  |       |   |   | 160 | 140 | 95  | 90 |
| 28,94 | 1 | 10 |     |     | 0,5  |       |   |   | 138 | 138 | 90  | 90 |
| 20,42 | 1 | 8  |     |     | 0,2  |       |   |   | 115 | 120 | 85  | 79 |
| 37,11 | 0 | 5  | 110 | 60  | 0,4  | 25,86 | 0 | 0 | 121 | 110 | 64  | 60 |
| 38,32 | 0 | 3  | 130 | 80  | 0    |       | 0 | 0 | 130 | 130 | 80  | 80 |
| 34,04 | 0 | 5  | 130 | 80  | 1,1  | 25,06 | 0 | 0 | 156 | 115 | 97  | 79 |
| 25,46 | 0 | 7  | 125 | 80  | 3,9  | 21,56 | 0 | 0 | 143 | 121 | 90  | 70 |
| 34,24 | 0 | 8  | 120 | 80  | 6    |       | 0 | 0 | 132 | 120 | 82  | 72 |
| 39,27 | 0 | 7  |     |     | 2,7  | 25,58 | 0 | 0 | 170 | 140 | 100 | 90 |
| 59,5  | 0 | 6  | 140 | 90  | 0,4  |       | 0 | 0 | 155 | 140 | 98  | 90 |
| 35,33 | 0 | 5  |     |     |      |       | 0 | 0 |     |     |     |    |
| 37,69 | 0 | 8  | 130 | 90  | 2,7  | 26,45 | 0 | 0 | 148 | 128 | 98  | 80 |
| 33,35 | 0 | 4  | 140 | 86  | 2,4  | 20,02 | 0 | 0 | 140 | 138 | 86  | 80 |
| 65,31 | 0 | 11 | 140 | 86  |      |       | 0 | 0 | 140 | 140 | 86  | 86 |
| 52,77 | 1 | 7  | 110 | 60  | 3,1  | 24,87 | 0 | 0 | 132 | 110 | 88  | 60 |
| 42,46 | 1 | 8  | 108 | 82  | 0,4  | 24,76 | 0 | 0 | 115 | 108 | 82  | 70 |
| 38,54 | 0 | 8  | 120 | 80  | 3,9  | 24    | 0 | 0 | 146 | 110 | 80  | 60 |

|       |   |    |     |     |      |       |   |   |     |     |     |     |
|-------|---|----|-----|-----|------|-------|---|---|-----|-----|-----|-----|
| 41,25 | 1 | 7  | 120 | 85  |      |       | 0 | 0 |     |     |     |     |
| 48,8  | 0 | 7  | 130 | 85  | 4    | 32,08 | 0 | 0 | 155 | 120 | 100 | 70  |
| 40,78 | 0 | 12 | 148 | 82  | 10   |       | 0 | 0 | 160 | 140 | 82  | 70  |
| 46,41 | 0 | 8  | 120 | 70  | 3,2  | 17,52 | 0 | 0 | 120 | 110 | 70  | 68  |
| 43,66 | 1 | 10 | 140 | 75  | 3,3  | 24,3  | 0 | 0 | 160 | 140 | 86  | 75  |
| 39,66 | 0 | 9  | 120 | 80  | 3,7  | 21,4  | 0 | 0 | 158 | 120 | 86  | 80  |
| 32,19 | 1 | 13 |     |     | 6,3  |       | 0 | 0 | 120 | 120 | 70  | 70  |
| 55,09 | 0 | 10 | 140 | 85  | 3,1  | 33,36 | 0 | 0 | 145 | 145 | 80  | 80  |
| 40,76 | 0 | 7  | 150 | 85  | 2    |       | 0 | 0 | 150 | 150 | 85  | 85  |
| 22,41 | 0 | 7  |     |     | 4,1  | 21,56 | 0 | 0 |     |     |     |     |
| 42,75 | 0 | 6  | 130 | 90  | 5,5  | 21,36 | 0 | 0 | 150 | 130 | 90  | 80  |
| 26,86 | 1 | 4  | 130 | 85  | 0,3  | 21,29 | 0 | 0 | 120 | 120 | 80  | 80  |
| 29,08 | 1 | 11 |     |     |      |       | 0 | 0 |     |     |     |     |
| 52,79 | 0 | 10 | 140 | 70  | 6,8  | 23,48 | 0 | 0 | 145 | 100 | 80  | 50  |
| 51,53 | 1 | 7  | 120 | 60  | 0,6  | 22,78 | 0 | 0 | 120 | 120 | 60  | 60  |
| 40,56 | 1 | 11 | 135 | 90  | 4,7  | 21,95 | 0 | 0 | 135 | 118 | 90  | 75  |
| 20,55 | 1 | 6  | 85  | 70  | 0    | 27,48 | 0 | 1 | 90  | 85  | 75  | 70  |
| 31,47 | 0 | 12 | 105 | 65  | 5,9  | 25,86 | 0 | 0 | 105 | 80  | 65  | 55  |
| 47,05 | 0 | 7  |     |     | 2,3  |       | 0 | 1 | 90  | 80  | 70  | 70  |
| 43,78 | 0 | 23 |     |     | 12,2 |       | 0 | 0 | 155 | 105 | 92  | 50  |
| 40,23 | 0 | 12 | 120 | 75  | 5,1  | 18,27 | 0 | 0 | 145 | 132 | 80  | 70  |
| 27,53 | 0 | 10 | 130 | 80  | 3,2  | 24,47 | 0 | 0 | 130 | 130 | 80  | 80  |
| 38,63 | 0 | 9  | 160 | 110 | 3,5  | 31,66 | 0 | 0 | 160 | 126 | 111 | 70  |
| 40,55 | 1 | 9  | 120 | 80  | 1,9  |       | 0 | 0 | 120 | 100 | 84  | 60  |
| 37,12 | 0 | 9  | 160 | 100 |      |       | 0 | 0 | 210 | 140 | 110 | 100 |
| 49,37 | 0 | 10 | 115 | 70  | 2,5  | 21,24 | 0 | 0 | 115 | 95  | 78  | 70  |
| 52,83 | 0 | 8  |     |     | 0,9  |       | 0 | 0 | 130 | 120 | 92  | 70  |
| 46,94 | 1 | 9  | 140 | 80  | 4,3  | 26,08 | 0 | 0 | 140 | 124 | 80  | 80  |
| 25,22 | 0 | 10 | 115 | 80  | 1,2  |       | 0 | 0 | 148 | 115 | 80  | 65  |
| 27,05 | 0 | 8  | 120 | 90  | 1,9  | 24,46 | 0 | 0 | 120 | 120 | 90  | 90  |
| 31,03 | 0 | 9  | 115 | 60  | 5    | 20,46 | 0 | 0 | 125 | 110 | 95  | 60  |
| 33,03 | 0 | 7  | 146 | 86  | 4    | 24,57 | 0 | 0 | 160 | 127 | 95  | 74  |
| 29,81 | 0 | 10 | 94  | 80  | 4,1  | 33,72 | 0 | 0 | 159 | 94  | 111 | 80  |



|       |   |    |     |     |       |       |   |   |     |     |     |     |
|-------|---|----|-----|-----|-------|-------|---|---|-----|-----|-----|-----|
| 59,74 | 0 | 13 | 105 | 75  | 9,9   | 26,23 | 0 | 0 | 140 | 105 | 94  | 72  |
| 32,07 | 0 | 5  | 115 | 60  | 1,2   | 30,53 | 0 | 0 | 115 | 115 | 60  | 60  |
| 47,06 | 1 | 8  | 110 | 78  | 3,2   | 32,41 | 0 | 0 | 134 | 110 | 95  | 65  |
| 31,36 | 0 | 8  | 116 | 74  | 3     | 22,18 | 0 | 0 | 120 | 100 | 80  | 55  |
| 55,39 | 0 | 3  | 110 | 80  | 0     | 23,59 | 0 | 0 | 110 | 110 | 80  | 80  |
| 41,97 | 0 | 7  | 120 | 65  | 6,2   | 22,66 | 1 | 0 | 152 | 120 | 86  | 65  |
| 44,97 | 0 | 22 | 120 | 90  | 2,7   | 22,46 | 1 | 0 | 160 | 120 | 98  | 70  |
| 36,19 | 0 | 13 | 134 | 110 | 12    | 34,72 | 1 | 0 | 155 | 95  | 110 | 60  |
| 35,6  | 0 | 10 | 140 | 75  | 8,3   |       | 1 | 0 | 180 | 130 | 75  | 60  |
| 33,02 | 1 | 5  |     |     | 2,6   |       |   |   | 154 | 154 | 100 | 100 |
| 49,53 | 0 | 5  |     |     | 0,8   |       |   |   | 130 | 119 | 80  | 60  |
| 33,77 | 1 | 7  |     |     | 2,6   |       |   |   | 110 | 105 | 70  | 60  |
| 30    | 1 | 1  |     |     |       |       |   |   |     |     |     |     |
| 57,92 | 0 | 20 |     |     | 4,9   |       |   |   | 144 | 110 | 100 | 60  |
| 39    | 0 | 7  | 120 | 70  | 6,8   | 20,24 | 0 | 0 | 120 | 113 | 76  | 70  |
| 31,33 | 0 | 10 | 140 | 70  | 5,3   | 27,6  | 0 | 0 | 173 | 135 | 88  | 69  |
| 36,92 | 0 | 10 | 120 | 80  | 4,9   |       | 0 | 0 | 166 | 113 | 101 | 74  |
| 27,17 | 0 | 9  | 125 | 80  | 4,2   | 20,93 | 0 | 0 | 130 | 116 | 71  | 84  |
| 29,71 | 1 | 11 | 115 | 90  | 5     |       | 0 | 0 | 130 | 115 | 90  | 80  |
| 30,03 | 1 | 6  | 110 | 76  | 1,7   | 21,9  | 0 | 0 | 132 | 102 | 93  | 63  |
| 49,79 | 1 | 6  | 122 | 80  | 0,9   | 32,44 | 0 | 0 | 122 | 117 | 75  | 75  |
| 28,82 | 0 | 12 | 60  |     | 10,55 | 27,4  | 1 | 1 | 153 | 60  | 95  | 69  |
| 67,01 | 1 | 30 | 180 | 72  |       |       | 1 | 1 | 119 | 68  | 71  | 39  |
| 63,74 | 1 | 9  |     |     |       |       | 0 | 0 |     |     |     |     |
| 49,18 | 1 | 14 | 90  | 65  | 7,1   | 30,08 | 0 | 1 | 165 | 86  | 106 | 61  |
| 37,33 | 0 | 22 | 70  | 30  | 9,4   | 21,2  | 1 | 1 | 144 | 60  | 98  | 36  |

| Crea max | HKR max | Leuk max | Tromb min | CRP max | Alb min | ABL | Rh  |
|----------|---------|----------|-----------|---------|---------|-----|-----|
| 122      | 0,38    | 11,2     | 311       | 11      |         | AB  | neg |
| 194      | 0,46    | 13,1     | 114       | 81      |         | AB  | neg |
| 1183     | 0,39    | 14,5     | 18        | 34      | 32,9    | AB  | neg |
| 727      | 0,39    | 8,6      | 145       | 56      |         | AB  | neg |
| 143      | 0,42    | 6,8      | 61        | 78      |         | AB  | neg |
| 93       | 0,35    | 4,9      | 76        | 50      |         | AB  | neg |
| 484      | 0,43    | 7,8      | 56        | 109     | 29      | AB  | neg |
| 390      | 0,44    | 8,1      | 93        | 72      |         | AB  | pos |
| 138      | 0,41    | 9        | 67        | 81      | 25      | AB  | pos |
| 945      | 0,45    | 11,3     | 27        |         | 25,9    | AB  | pos |
| 373      | 0,5     | 12,6     | 83        | 97      | 29      | AB  | pos |
| 206      | 0,39    | 8,9      | 112       | 48      |         | AB  | pos |
| 152      | 0,56    | 19,8     | 26        | 115     | 24      | AB  | pos |
| 356      | 0,41    | 15,5     | 99        | 280     |         | AB  | pos |
| 320      | 0,44    | 6,3      | 101       | 51      |         | AB  | pos |
| 117      | 0,5     | 10,6     | 55        | 42      | 34      | AB  | pos |
| 329      | 0,39    | 5,3      | 114       |         |         | AB  | pos |
| 71       | 0,42    | 5,6      | 52        | 115     |         | AB  | pos |
| 108      | 0,41    | 7,1      | 41        | 83      |         | AB  | pos |
| 444      | 0,35    | 8,2      | 102       | 35      | 26      | AB  | pos |
| 350      | 0,41    | 12       | 95        | 25      |         | AB  | pos |
| 297      |         |          |           |         |         | AB  | pos |
| 151      | 0,4     | 8,7      | 47        | 114     | 30      | O   | neg |
| 236      | 0,45    | 16,1     | 23        | 67      |         | O   | neg |
| 452      | 0,41    | 7,2      | 76        | 45      |         | O   | neg |
| 205      | 0,43    | 8,5      | 51        | 118     |         | O   | neg |
| 102      | 0,45    | 20,9     | 9         | 66      |         | O   | neg |
| 328      | 0,48    | 8,6      | 52        | 103     |         | O   | neg |
| 235      | 0,54    | 17,9     | 35        | 134     |         | O   | neg |
| 918      | 0,41    | 12       | 60        | 104     |         | O   | neg |
| 929      | 0,44    | 15,5     | 45        | 92      | 25      | O   | neg |
|          |         |          |           |         |         | O   | neg |

|      |      |      |     |       |        |     |
|------|------|------|-----|-------|--------|-----|
| 922  | 0,4  | 8,9  | 172 | 36    | 34 O   | neg |
| 866  | 0,35 | 13,1 | 67  | 30    | 30 O   | neg |
| 100  | 0,4  | 4,6  | 72  | 90    | O      | pos |
| 756  | 0,56 | 14,8 | 17  | 203,6 | 19 O   | pos |
| 92   | 0,41 | 7,8  | 74  | 91    | O      | pos |
|      |      |      |     |       | O      | pos |
| 538  | 0,62 | 23,3 | 11  | 111   | 22 O   | pos |
| 987  | 0,36 | 12,1 | 178 | 22    | 29 O   | pos |
| 208  | 0,45 | 8,9  | 35  | 26    | O      | pos |
| 90   | 0,4  | 10,1 | 57  | 136   | 28 O   | pos |
| 111  | 0,4  | 11,3 | 26  | 55    | O      | pos |
| 73   | 0,44 | 5    | 93  | 16    | O      | pos |
| 730  | 0,43 | 9,1  | 332 | 29    | 31 O   | pos |
| 111  | 0,39 | 8,6  | 70  | 80    | O      | pos |
| 121  | 0,45 | 4,8  | 80  | 41    | O      | pos |
| 161  | 0,47 | 6,4  | 37  | 64    | O      | pos |
| 125  | 0,45 | 5,1  | 152 | 81    | O      | pos |
| 122  | 0,45 | 10,1 | 100 | 59    | O      | pos |
| 90   | 0,37 | 4,1  | 99  | 103   | O      | pos |
| 178  | 0,5  | 13,3 | 38  | 21    | 35 O   | pos |
| 91   | 0,42 | 4,5  | 54  | 68    | O      | pos |
| 801  | 0,51 | 17,2 | 44  | 70    | 28,7 O | pos |
| 80   | 0,36 | 5,4  |     | 39    | O      | pos |
| 537  | 0,57 | 17,5 | 9   | 77    | O      | pos |
| 392  | 0,55 | 14,8 | 17  |       | O      | pos |
| 475  | 0,38 | 8,4  | 160 | 39    | O      | pos |
| 139  | 0,52 | 7,8  | 64  |       | O      | pos |
| 166  | 0,49 | 8,4  | 60  |       | O      | pos |
| 830  | 0,57 | 23,5 | 144 |       | O      | pos |
| 165  | 0,61 | 11,3 | 19  | 49    | O      | pos |
| 1241 | 0,26 | 9,4  | 33  | 45    | O      | pos |
| 227  | 0,38 | 9,1  | 134 | 61    | O      | pos |
| 1290 | 0,4  | 12,9 | 68  | 133   | O      | pos |

|      |      |      |     |      |        |     |
|------|------|------|-----|------|--------|-----|
| 265  | 0,41 | 10,1 | 85  | 36   | 34 O   | pos |
| 94   | 0,39 | 6,9  | 88  | 97   | 31 O   | pos |
| 134  | 0,53 | 44,7 | 24  | 95   | 28 O   | pos |
| 102  | 0,46 | 9,4  | 63  | 87   | O      | pos |
| 108  |      |      | 154 | 38   | O      | pos |
| 70   | 0,42 | 7,9  |     | 35   | O      | pos |
| 119  | 0,4  | 5,3  | 88  | 53   | O      | pos |
| 478  | 0,36 | 8    | 127 | 23   | O      | pos |
| 138  | 0,38 | 6,3  | 36  | 123  | O      | pos |
| 198  | 0,41 | 5,8  | 70  | 68   | 28 O   | pos |
| 421  | 0,44 | 9    | 167 | 110  | O      | pos |
| 792  | 0,34 | 13,8 | 30  | 42   | O      | pos |
| 116  | 0,38 | 5,3  | 103 | 118  | O      | pos |
| 109  | 0,42 | 6,4  | 71  | 43   | O      | pos |
| 100  | 0,38 | 5,9  | 84  | 29   | O      | pos |
| 621  | 0,37 | 10,4 | 154 | 56   | O      | pos |
| 222  | 0,43 | 8,3  | 39  | 56   | O      | pos |
| 224  | 0,39 | 13,9 | 239 | 20   | 39,7 O | pos |
| 72   | 0,46 | 10,5 | 95  | 48   | O      | pos |
| 147  | 0,46 | 3,8  | 81  | 37   | O      | pos |
| 487  | 0,42 | 8,4  | 97  | 45   | O      | pos |
| 200  | 0,41 | 8,2  | 36  | 86   | O      | pos |
| 223  | 0,42 | 8,5  | 75  | 145  | 28 O   | pos |
| 206  | 0,43 | 5,4  | 54  | 80   | 37,2 O | pos |
| 102  | 0,39 | 9,9  | 63  | 43   | O      | pos |
| 515  | 0,54 | 43,3 | 10  | 75   | 25 O   | pos |
| 128  | 0,45 | 6,9  | 24  | 113  | O      | pos |
| 581  | 0,33 | 7,5  | 228 | 51   | 35,8 O | pos |
| 85   | 0,39 | 7,5  | 36  | 87   | 26 O   | pos |
| 1156 | 0,56 | 21   | 19  | 109  | 24 O   | pos |
| 1246 | 0,4  | 12,7 | 42  | 68   | O      | pos |
| 1071 | 0,39 | 18,3 | 28  | 33   | O      | pos |
| 264  | 0,5  | 7,1  | 51  | 62,3 | O      | pos |

|      |      |      |     |     |      |     |
|------|------|------|-----|-----|------|-----|
| 292  | 0,45 | 6,9  | 181 | 28  | 43 O | pos |
| 126  | 0,49 | 17,6 | 27  | 27  | 28 O | pos |
| 109  |      |      |     |     | O    | pos |
| 88   | 0,4  | 6,8  | 31  | 112 | O    | pos |
| 568  | 0,52 | 15,5 | 54  | 81  | 27 O | pos |
| 90   | 0,43 | 4,9  | 87  | 12  | O    | pos |
| 75   | 0,38 | 6,5  | 80  | 100 | O    | pos |
| 237  | 0,46 | 9,9  | 52  | 76  | O    | pos |
| 150  | 0,49 | 16,2 | 19  | 75  | O    | pos |
| 139  | 0,42 | 10,2 | 66  | 95  | 37 O | pos |
| 260  | 0,45 | 11,5 | 56  | 45  | 30 O | pos |
| 123  | 0,47 | 6,5  | 80  | 39  | 27 O | pos |
| 71   | 0,42 | 6,2  | 35  | 73  | O    | pos |
| 122  | 0,41 | 10,8 | 75  | 64  | O    | pos |
| 1281 | 0,47 | 8,2  | 47  | 169 | O    | pos |
| 241  | 0,43 | 26,8 | 13  | 214 | O    | pos |
| 648  | 0,4  | 19,7 | 18  | 43  | O    | pos |
| 267  | 0,47 | 9,8  | 78  | 69  | 36 B | neg |
| 496  | 0,39 | 10,3 | 96  | 46  | B    | neg |
| 296  | 0,43 | 14,1 | 60  | 85  | 30 B | neg |
| 621  | 0,59 | 16,6 | 15  | 52  | 28 B | neg |
| 95   | 0,35 | 5,9  | 67  | 111 | 30 B | neg |
| 749  | 0,43 | 14,7 | 59  | 34  | 25 B | neg |
| 173  | 0,45 | 13,3 | 69  | 107 | B    | neg |
| 197  | 0,42 | 8,9  | 100 | 63  | 34 B | pos |
| 529  | 0,47 | 17,9 | 55  | 29  | 24 B | pos |
| 489  | 0,41 | 16,7 | 52  | 66  | B    | pos |
| 67   | 0,36 | 6,8  | 60  | 109 | B    | pos |
| 353  | 0,51 | 10,1 | 97  | 95  | 31 B | pos |
| 1304 | 0,41 | 19,4 | 71  | 47  | 22 B | pos |
| 182  |      | 9,2  | 141 | 45  | B    | pos |
| 310  | 0,44 | 10,3 | 168 | 96  | B    | pos |
| 502  | 0,41 | 11,8 | 264 | 58  | B    | pos |

|      |      |      |     |     |        |     |
|------|------|------|-----|-----|--------|-----|
| 500  | 0,41 | 10,7 | 122 | 44  | B      | pos |
| 72   | 0,4  | 4,4  | 64  | 37  | 28 B   | pos |
| 590  | 0,39 | 8,7  | 44  | 118 | 23 B   | pos |
| 73   | 0,43 | 9,3  | 135 | 116 | B      | pos |
| 79   | 0,38 | 8,6  | 136 | 126 | 34 B   | pos |
| 515  | 0,64 | 37,7 | 20  | 27  | 29 B   | pos |
| 135  | 0,44 | 8,4  | 61  | 136 | 35 B   | pos |
| 332  | 0,51 | 26,1 | 20  | 80  | B      | pos |
| 123  | 0,43 | 5,7  | 44  | 137 | B      | pos |
| 156  | 0,51 | 9,3  | 61  | 85  | B      | pos |
| 138  | 0,41 | 7,9  | 84  | 156 | B      | pos |
| 218  | 0,32 | 8,3  | 160 | 50  | B      | pos |
| 218  | 0,45 | 12,1 | 213 | 104 | B      | pos |
| 184  | 0,45 | 6,9  | 82  | 32  | 36,8 B | pos |
| 170  | 0,57 | 11   | 70  | 21  | B      | pos |
| 292  | 0,38 | 7,7  | 142 | 20  | 33,5 B | pos |
| 539  | 0,42 | 8,8  | 108 | 71  | 35 B   | pos |
| 324  | 0,39 | 5,9  | 230 | 54  | B      | pos |
| 393  | 0,44 | 7,5  | 102 |     | 34 B   | pos |
| 77   |      |      |     |     | B      | pos |
| 541  | 0,5  | 12,1 | 13  | 120 | 25 B   | pos |
| 1105 | 0,39 | 22,9 | 10  | 35  | B      | pos |
| 1537 |      | 50,3 | 18  |     | B      | pos |
| 171  | 0,37 | 8,5  | 66  | 13  | B      | pos |
| 361  | 0,41 | 9,2  | 42  | 65  | 23 B   | pos |
| 356  | 0,42 | 8,3  | 28  | 83  | 27 B   | pos |
| 78   | 0,45 | 7,7  | 3   | 69  | 39 B   | pos |
| 91   | 0,41 | 6,8  | 57  | 90  | 39 B   | pos |
| 543  | 0,41 | 13,1 | 33  | 120 | B      | pos |
| 473  | 0,56 | 17,4 | 24  | 101 | 26 B   | pos |
| 333  | 0,4  | 9,7  | 98  | 67  | B      | pos |
| 1042 | 0,54 | 35,4 | 11  | 113 | 27 B   | pos |
| 544  | 0,43 | 12,3 | 192 | 26  | 32,8 A | neg |

|      |      |      |     |     |        |     |
|------|------|------|-----|-----|--------|-----|
| 237  | 0,42 | 8,4  | 205 | 36  | A      | neg |
| 148  | 0,45 | 12,9 | 163 | 13  | A      | neg |
| 281  |      | 8,6  | 89  | 22  | A      | neg |
| 105  | 0,4  | 7,5  | 93  | 31  | A      | neg |
| 181  | 0,46 | 11,2 | 46  | 32  | A      | neg |
| 290  | 0,41 | 7,3  | 98  | 92  | A      | neg |
| 126  | 0,44 | 10,1 | 56  | 84  | A      | neg |
| 405  | 0,51 | 14,5 | 39  | 115 | 25,6 A | neg |
| 943  | 0,42 | 13,5 | 74  | 92  | A      | neg |
| 493  | 0,41 | 10,7 | 121 | 19  | A      | neg |
| 252  | 0,38 | 7,1  | 348 | 33  | A      | neg |
| 120  | 0,38 | 10,4 | 94  | 175 | 30 A   | neg |
| 1026 | 0,62 | 32,4 | 15  |     | A      | neg |
| 254  | 0,43 | 11,1 | 39  | 101 | A      | pos |
| 178  | 0,58 | 18,1 | 40  | 100 | 26 A   | pos |
| 222  | 0,44 | 17,1 | 10  | 118 | 22 A   | pos |
| 241  | 0,39 | 9,7  | 109 | 100 | 31,8 A | pos |
| 94   | 0,43 | 7,2  | 68  | 130 | 32 A   | pos |
| 792  | 0,39 | 13,2 | 29  | 195 | 21 A   | pos |
| 81   | 0,42 | 9,6  | 73  | 120 | 29 A   | pos |
| 121  | 0,45 | 9,8  | 128 | 160 | A      | pos |
| 93   | 0,41 | 9,1  | 96  | 124 | A      | pos |
| 265  | 0,37 | 9,8  | 68  | 36  | A      | pos |
| 85   | 0,43 | 8,4  | 82  | 68  | A      | pos |
| 233  | 0,42 | 7    | 56  | 131 | A      | pos |
| 363  | 0,42 | 10,2 | 182 | 40  | A      | pos |
| 127  | 0,38 | 10,9 | 95  | 77  | A      | pos |
| 155  | 0,41 | 8    | 270 | 139 | A      | pos |
| 506  |      |      |     |     | A      | pos |
| 293  | 0,41 | 19,7 | 9   | 59  | A      | pos |
| 102  | 0,46 | 6,7  | 106 | 32  | A      | pos |
| 164  | 0,54 | 11,4 | 30  | 11  | A      | pos |
| 466  | 0,42 | 10,4 | 150 | 33  | 30 A   | pos |

|     |      |      |     |     |        |     |
|-----|------|------|-----|-----|--------|-----|
| 398 | 0,38 | 14,7 | 71  | 63  | 27 A   | pos |
| 126 | 0,39 | 7,8  | 72  | 143 | A      | pos |
| 441 | 0,38 | 11,2 | 55  | 50  | 28,9 A | pos |
| 138 | 0,41 | 13,4 | 165 | 42  | A      | pos |
| 509 | 0,43 | 9,1  | 68  | 93  | 37,4 A | pos |
| 403 | 0,64 | 17,6 | 52  | 19  | 29 A   | pos |
| 231 | 0,49 | 19,4 | 26  | 125 | A      | pos |
| 397 | 0,47 | 15,8 | 282 | 120 | 31 A   | pos |
| 393 | 0,46 | 11,4 | 137 | 23  | A      | pos |
| 607 | 0,43 | 17   | 25  | 103 | A      | pos |
| 630 | 0,38 | 9,3  | 192 |     | A      | pos |
| 171 | 0,51 | 14,5 | 38  | 52  | A      | pos |
| 142 | 0,38 | 10,9 | 98  |     | A      | pos |
| 396 |      | 11,3 | 109 | 40  | A      | pos |
| 200 | 0,46 |      | 42  | 89  | A      | pos |
| 350 | 0,42 | 7,4  | 21  | 58  | A      | pos |
| 134 | 0,44 | 7,4  | 201 | 27  | A      | pos |
| 113 | 0,42 | 7,8  | 64  |     | A      | pos |
| 340 | 0,41 | 8,3  | 57  | 27  | 41,5 A | pos |
| 275 | 0,38 | 11,6 | 29  | 200 | 27 A   | pos |
| 98  | 0,48 | 8,9  | 118 | 70  | 45 A   | pos |
| 74  | 0,41 | 8,9  | 105 | 82  | 34 A   | pos |
| 149 | 0,5  | 8,3  | 55  | 55  | A      | pos |
| 756 | 0,43 | 9,8  | 84  | 82  | 33 A   | pos |
| 290 | 0,41 | 7,7  | 51  | 61  | A      | pos |
| 212 | 0,45 | 8,4  | 70  | 42  | A      | pos |
| 163 | 0,43 | 6    | 73  | 83  | A      | pos |
| 319 | 0,46 | 11,4 | 109 | 103 | 30 A   | pos |
| 124 | 0,39 | 9,8  | 80  | 84  | A      | pos |
| 182 | 0,42 | 13,3 | 53  | 133 | A      | pos |
| 223 | 0,4  | 9,1  | 67  | 42  | 30 A   | pos |
| 274 | 0,46 | 10,3 | 74  | 103 | 27 A   | pos |
| 915 | 0,35 | 11,6 | 112 | 88  | A      | pos |



|      |      |      |     |     |        |     |
|------|------|------|-----|-----|--------|-----|
| 93   | 0,44 | 4,5  | 46  | 124 | A      | pos |
| 376  | 0,42 | 11,4 | 111 | 83  | 34 A   | pos |
| 972  | 0,34 | 13   | 85  | 22  | 27 A   | pos |
| 80   | 0,39 | 6,2  | 36  | 55  | A      | pos |
| 238  | 0,41 | 11,1 |     | 32  | A      | pos |
| 181  | 0,46 | 9    | 69  | 57  | A      | pos |
| 379  | 0,41 | 10,1 | 63  | 86  | A      | pos |
| 124  | 0,46 | 8    | 89  | 69  | 35,5 A | pos |
| 83   | 0,42 | 11,5 | 89  | 55  | 33 A   | pos |
| 349  | 0,39 | 7,7  | 167 | 32  | A      | pos |
| 1645 | 0,43 | 16,1 | 54  | 32  | A      | pos |
| 90   | 0,42 | 9,6  | 70  | 53  | 31,4 A | pos |
| 369  | 0,37 | 11,8 | 70  | 108 | A      | pos |
| 484  | 0,43 | 12,8 | 378 |     | A      | pos |
| 71   | 0,43 | 6,2  | 74  | 111 | A      | pos |
| 515  | 0,46 | 7,4  | 45  | 75  | 24 A   | pos |
| 119  | 0,42 | 8,6  | 130 | 70  | A      | pos |
| 559  | 0,5  | 15   | 56  | 68  | 30,9 A | pos |
| 219  | 0,51 | 12,1 | 78  | 68  | 29 A   | pos |
| 1011 | 0,62 | 29,5 | 10  | 109 | 19 A   | pos |
| 1168 | 0,37 | 10,1 | 65  | 31  | A      | pos |
| 380  | 0,44 | 10,4 | 106 | 17  | A      | pos |
| 119  | 0,35 | 9,5  | 139 | 49  | A      | pos |
| 264  | 0,34 | 6,8  | 96  | 96  | A      | pos |
| 219  | 0,46 | 12,1 | 122 | 77  | A      | pos |
| 238  | 0,43 | 8    | 38  | 44  | A      | pos |
| 152  | 0,46 | 9,2  | 147 | 77  | A      | pos |
| 720  | 0,37 | 10,5 | 314 | 53  | A      | pos |
| 285  | 0,42 | 8,2  | 111 |     | 39 A   | pos |
| 114  | 0,5  | 9,2  | 62  | 64  | A      | pos |
| 369  | 0,49 | 13,3 | 30  | 15  | A      | pos |
| 484  | 0,37 | 5,8  | 36  | 98  | 26 A   | pos |
| 455  | 0,6  | 22,6 | 18  | 56  | 29 A   | pos |

|      |      |      |     |      |        |     |
|------|------|------|-----|------|--------|-----|
| 725  | 0,47 | 20,4 | 17  | 72   | 25 A   | pos |
| 98   | 0,45 | 7    | 104 | 104  | 32 A   | pos |
| 458  | 0,42 | 11,2 | 139 | 53   | 32 A   | pos |
| 259  | 0,5  | 8,2  | 36  | 87   | A      | pos |
| 92   | 0,4  | 6    | 108 | 94   | A      | pos |
| 725  | 0,44 | 15,6 | 71  | 62   | A      | pos |
| 1443 | 0,5  | 19   | 12  | 181  | 26 A   | pos |
| 1285 | 0,49 | 23,2 | 9   | 37   | 27 A   | pos |
| 1324 | 0,4  | 9,6  | 108 | 75   | 30,4 A | pos |
| 185  | 0,46 | 11,7 | 26  | 96   | A      | pos |
| 112  | 0,41 | 9,5  | 107 | 68   | 38 A   | pos |
| 197  | 0,48 | 13,5 | 66  | 39   | 29 A   | pos |
| 75   |      |      |     |      | A      | pos |
| 350  | 0,57 |      | 36  | 154  | A      | pos |
| 524  | 0,39 | 12,9 | 24  | 26   | 24 A   | pos |
| 512  | 0,41 | 11,5 | 86  | 75   | A      | pos |
| 645  | 0,47 | 10,8 | 86  | 45   | A      | pos |
| 704  | 0,37 | 14,6 | 99  | 182  | 33 A   | pos |
| 426  | 0,58 | 19,8 | 77  | 108  | A      | pos |
| 175  | 0,4  | 8,6  | 74  | 29   | 30 A   | pos |
| 89   | 0,4  | 7,2  | 75  | 93   | 28 A   | pos |
| 641  | 0,66 | 39,1 | 4   | 44,8 | 24 A   | pos |
| 265  | 0,59 | 35,5 | 37  | 82,4 | 21 A   | pos |
| 155  |      |      | 53  |      | A      | pos |
| 950  | 0,54 | 8,1  | 22  | 194  | 22 A   | pos |
| 463  | 0,53 | 38,6 | 25  | 69,7 | 11 A   | pos |
